# Supplementary material
Source: MDPI journal article supplement (https://www.mdpi.com/2073-4433/11/6/630)
Supplement: s1 [file s1]

## Supplementary Materials

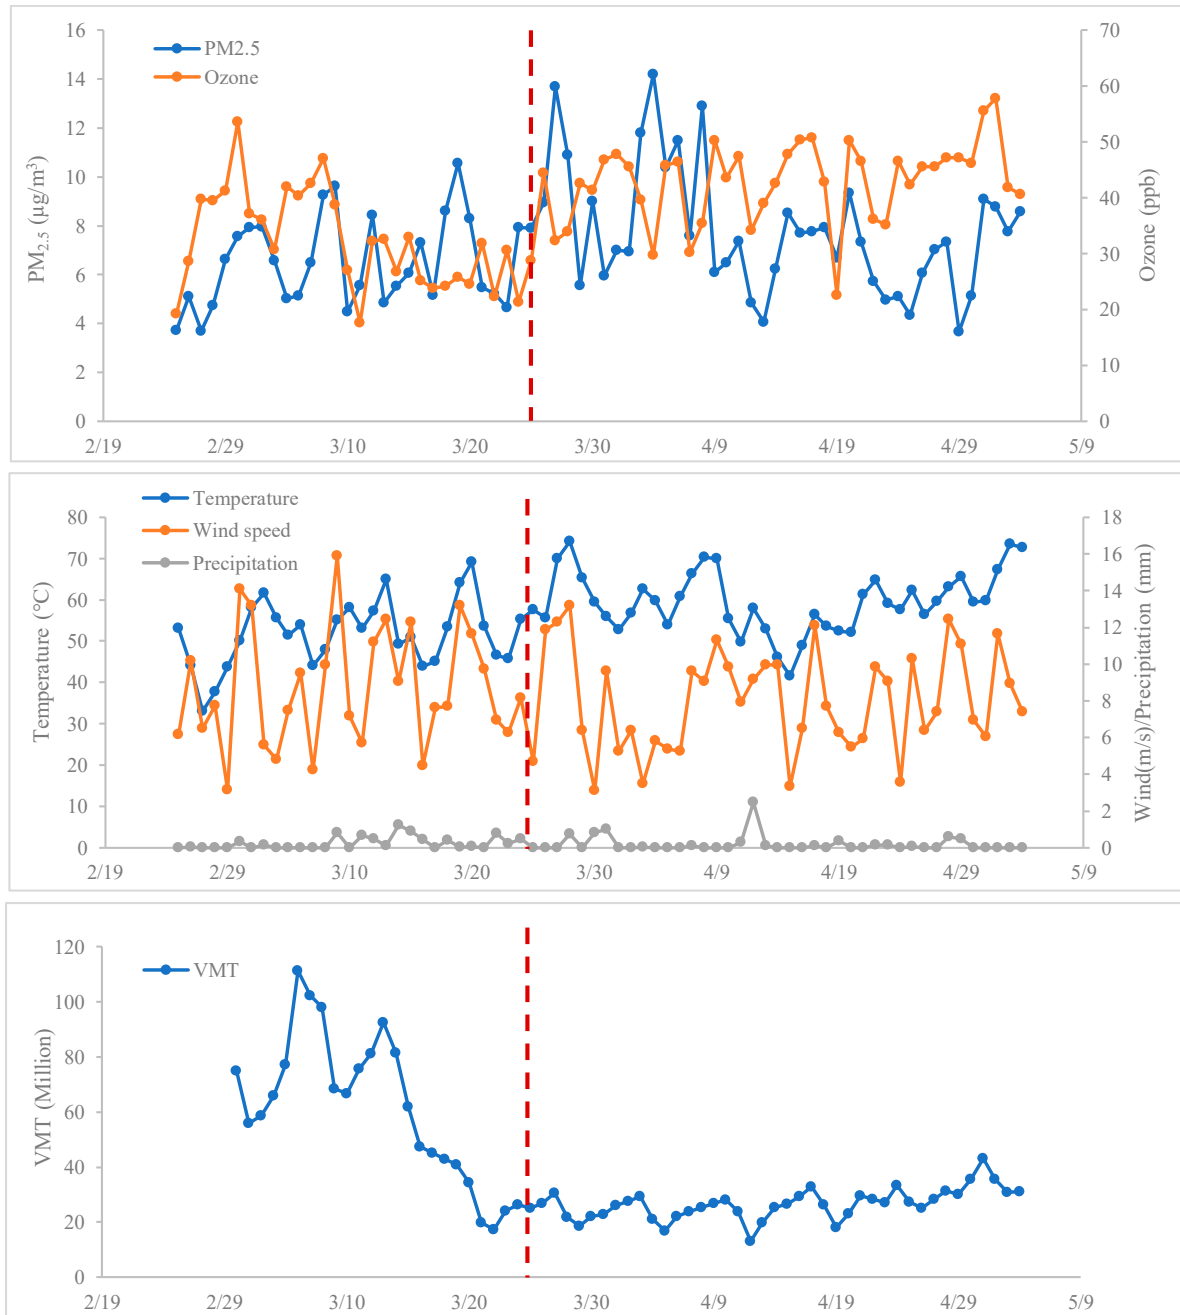

**Figure S1.** Daily average concentrations of criteria air pollutants, weather conditions, and vehicle miles traveled (VMT) in the Greater Memphis Area between 2/25 and 05/04, 2020. Notes: The lockdown period started 03/25 (dashed red line) and ended 05/04, 2020. Daily concentrations were the averages across multiple sites in this region.
